# Supplementary material for: Energy harvesting from clothing
Source: Royal Society of Chemistry journal article supplement (doi:10.1039/d4nr03719g), 2025-01-01
Supplement: d4nr03719g1.pdf [file d4nr03719g1.pdf]

## Energy harvesting from ordinary apparels basing on single electrode direct current triboelectric nanogenerator

Shuting Wang<sup>a</sup>, Fuqi Lu<sup>b</sup>, Wenhui Guan<sup>a</sup>, Zhongyuan You<sup>a</sup>, Bin Liao<sup>c</sup>, Meidong Huang<sup>b,\*</sup>,  
Yunliang Li<sup>d,e,\*</sup>, Weihai Fang<sup>a,\*</sup>, Ying Liu<sup>a,\*</sup>

- a. Department of Chemistry, Beijing Normal University, Beijing City, China
- b. College of Physics and Materials Science, Tianjin Normal University, 393 Binshuixi Road, Tianjin, 300387, China
- c. Beijing Normal Univ, Coll Nucl Sci & Technol, Key Lab Beam Technol, Minist Educ, Beijing 100875, Peoples R China
- d. National Laboratory for Condensed Matter Physics Institute of Physics, Chinese Academy of Sciences Beijing, Haidian District (100190), China
- e. Songshan Lake Materials Laboratory, Dongguan, Guangdong 523808, China.

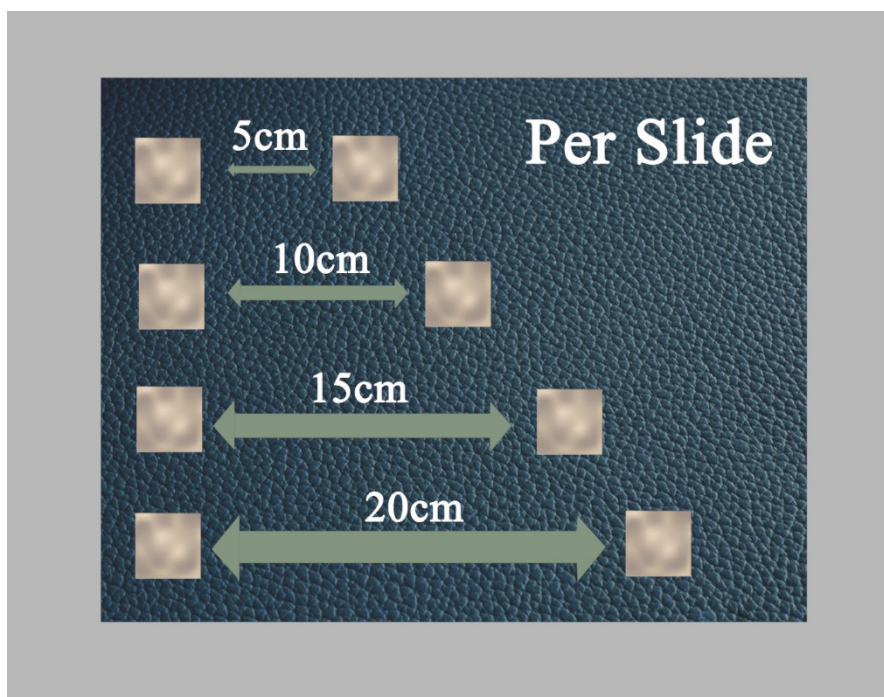

**Figure S1: Per sliding distance changes diagram.**

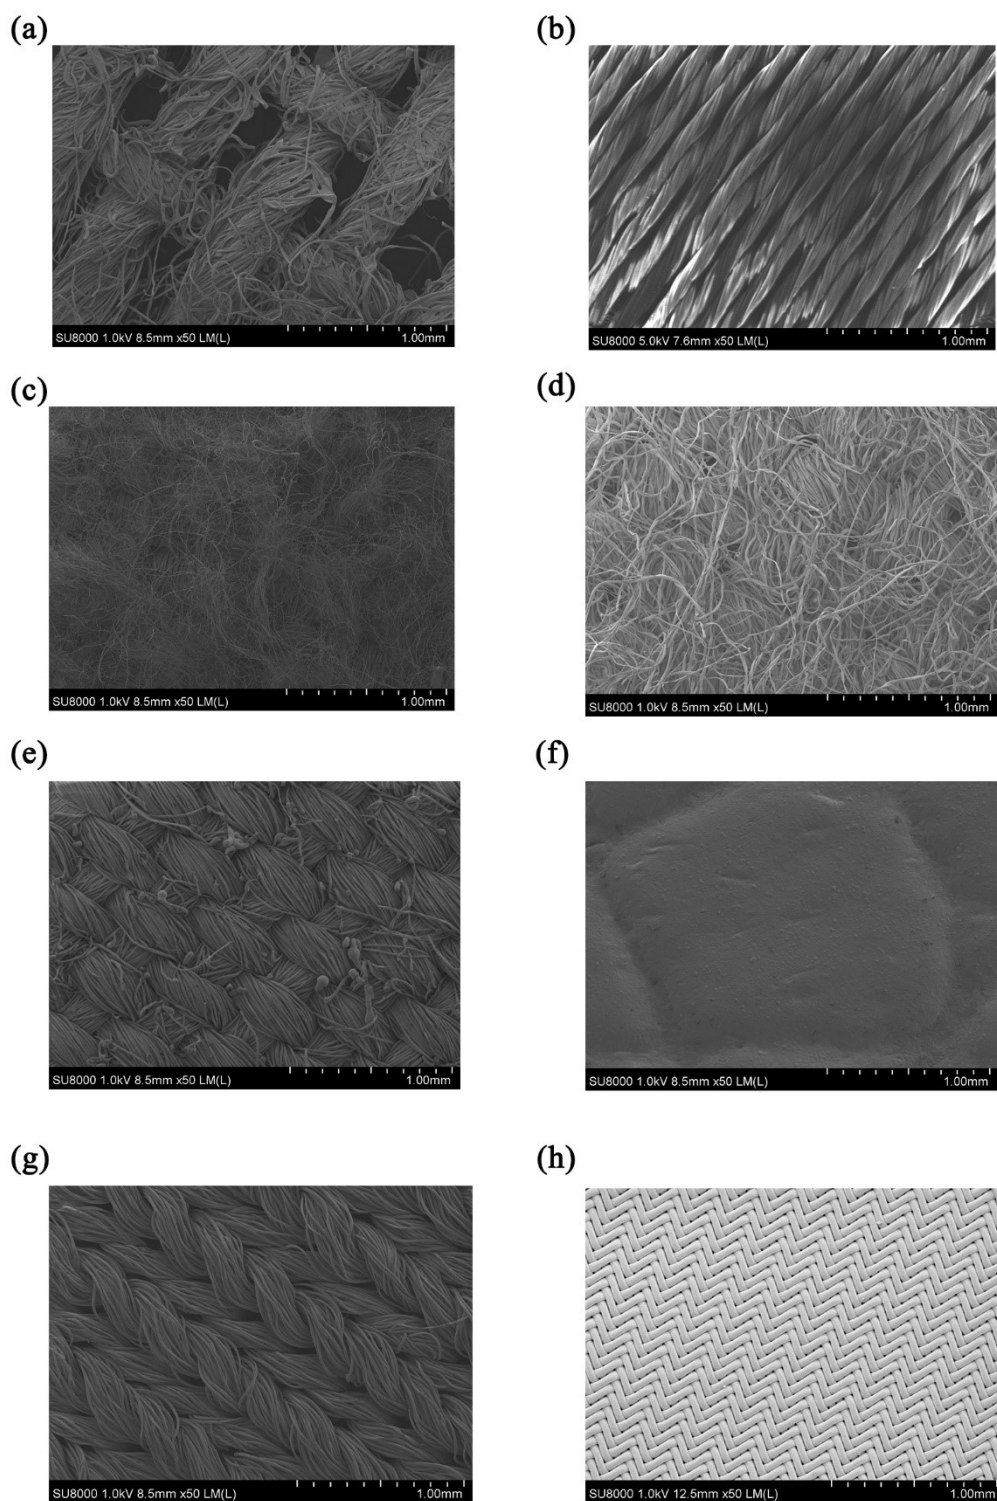

**Figure S2: SEM image of eight commercial fabrics. (a)Flax; (b)Silk; (c)Woolen cloth; (d)Cotton cloth; (e)Polyester; (f)Artificial leather; (g)Modal fiber; (h)Nylon.**

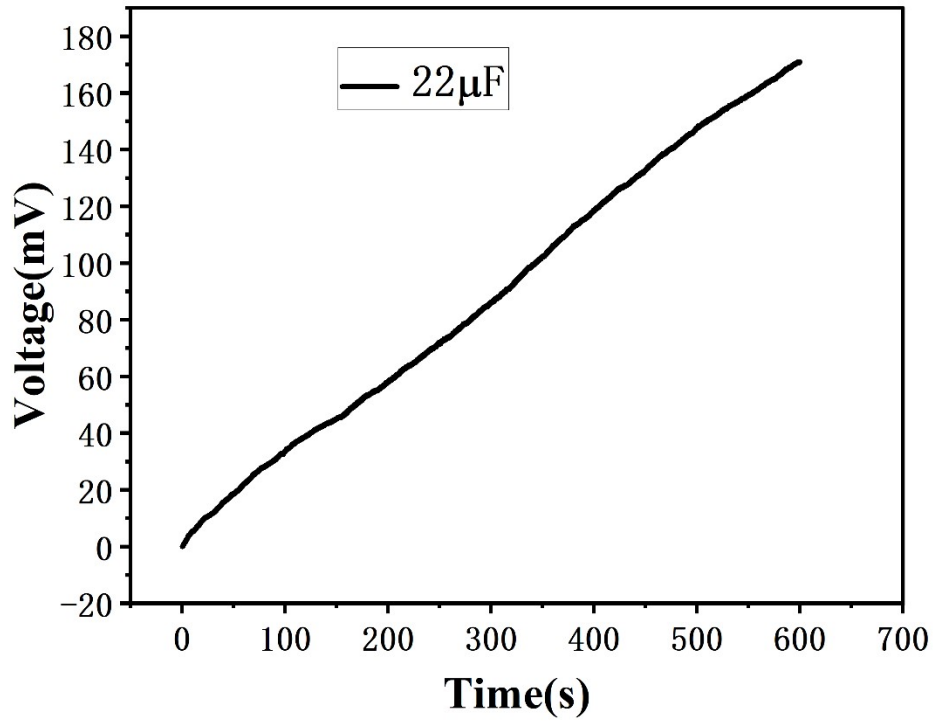

**Figure S3: The charging curves of the Zein-artificial leather TENG with 22  $\mu$ F capacitor**

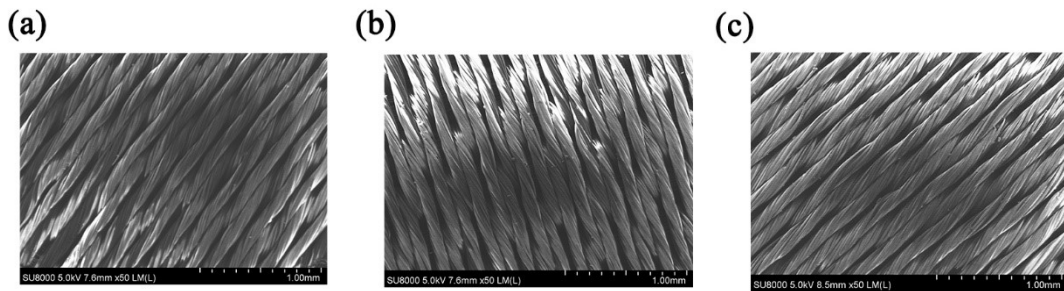

**Figure S4: SEM image of silk after sliding friction. (a)Original state; (b)100times; (c)1000times.**

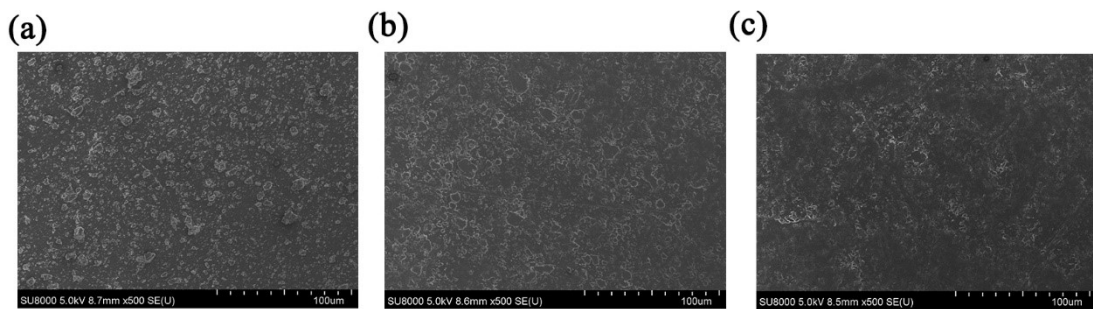

**Figure S5: SEM image of Zein film after sliding friction. (a)Original state; (b)100times; (c)1000times.**

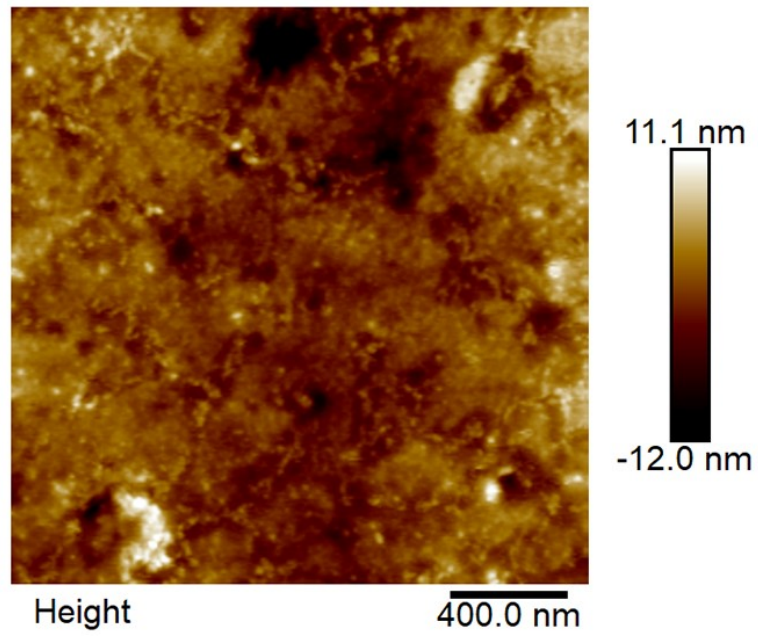

**Figure S6: AFM image of Zein film after sliding 1000times.**
